# Supplementary material
Source: ML conference proceedings conference paper supplement (https://proceedings.neurips.cc/paper_files/paper/2023/hash/50ca96a1a9ebe0b5e5688a504feb6107-Abstract.html)
Supplement: Supplementary file 1 [file 50ca96a1a9ebe0b5e5688a504feb6107-Supplemental-Conference.zip]

Archive with 2 entries (2 files):
- appendices.pdf
- code.zip
